# Supplementary material for: HIV-1 Glycan Density Drives the Persistence of the Mannose Patch within an Infected Individual
Source: PubMed Central journal article supplement (PMC5126371; doi:10.1128/jvi.01542-16), 2016-11-28
Supplement: JVI.01542-16_zjv999182187s1.pdf [file JVI.01542-16_zjv999182187s1.pdf]

**Table S1:** Abundance of oligomannose-type glycans for each CAP256 gp120. A breakdown of the distribution of structures within the oligomannose series (Man<sub>5-9</sub>GlcNAc<sub>2</sub>) are also reported. We have previously shown a coefficient of variance of 1.5 (mean 36.7, SD 0.6) for the assessment of the oligomannose series on gp120<sub>BaL</sub> expressed and analysed 5 times in parallel (Pritchard et al, Nat. Commun, 2015, 6:7479). Therefore a 4% variation in Man<sub>5-9</sub>GlcNAc<sub>2</sub> would represent ~6.6 SDs away from the mean and is therefore noteworthy. Percentage change in Man<sub>5-9</sub>GlcNAc<sub>2</sub> and Man<sub>9</sub>GlcNAc<sub>2</sub> compared to the SU virus for each CAP256 gp120 clone studied are calculated using the formula: % change = ((%CAP-%SU)/%SU)\*100).

| Virus sequence | Time after infection (Weeks) | OD PNGSs | gp160 PNGSs | gp120 PNGSs | M5   | M6   | M7   | M8   | M9   | Total (M5-M9) | % change in M9 compared to 15wks_SU | % change in M5-M9 compared to 15wks_SU |
|----------------|------------------------------|----------|-------------|-------------|------|------|------|------|------|---------------|-------------------------------------|----------------------------------------|
| 6wks PI        | 6                            | 13       | 27          | 23          | 10.6 | 4.3  | 6.8  | 8.7  | 4.9  | 35.3          | -46.2                               | -3.0                                   |
| 15wks SU       | 15                           | 14       | 29          | 25          | 6.9  | 3.6  | 6.9  | 9.9  | 9.1  | 36.4          | 0.0                                 | 0.0                                    |
| 23wks.14       | 23                           | 14       | 29          | 25          | 9.6  | 4.3  | 9.1  | 11.2 | 5.6  | 39.7          | -38.5                               | 9.1                                    |
| 23wks.13       | 23                           | 15       | 30          | 26          | 8.7  | 3.7  | 8.3  | 12.9 | 12.4 | 46.0          | 36.3                                | 26.4                                   |
| 30wks.2        | 30                           | 14       | 29          | 25          | 6.5  | 3.0  | 5.4  | 10.4 | 8.4  | 33.7          | -7.7                                | -7.3                                   |
| 34wks.22       | 34                           | 14       | 27          | 23          | 9.1  | 5.0  | 10.1 | 13.4 | 5.3  | 42.9          | -41.8                               | 17.9                                   |
| 34wks.31       | 34                           | 14       | 28          | 24          | 4.9  | 3.6  | 4.9  | 9.0  | 6.9  | 29.3          | -24.1                               | -19.6                                  |
| 38wks.16       | 38                           | 14       | 28          | 24          | 9.1  | 6.5  | 9.4  | 11.4 | 3.1  | 39.5          | -65.9                               | 8.5                                    |
| 38wks.19       | 38                           | 14       | 29          | 25          | 8.1  | 4.0  | 7.9  | 12.5 | 5.7  | 38.1          | -37.4                               | 4.7                                    |
| 38wks.38       | 38                           | 14       | 29          | 25          | 3.6  | 4.1  | 7.7  | 11.6 | 5.6  | 32.7          | -38.5                               | -10.2                                  |
| 48wks.8        | 48                           | 14       | 29          | 25          | 8.1  | 4.1  | 8.2  | 13.4 | 7.9  | 41.7          | -13.2                               | 14.6                                   |
| 48wks.10       | 48                           | 14       | 28          | 24          | 8.2  | 3.1  | 7.0  | 8.3  | 8.8  | 35.5          | -3.3                                | -2.5                                   |
| 48wks.17       | 48                           | 15       | 28          | 24          | 8.7  | 4.1  | 7.7  | 12.7 | 10.7 | 43.8          | 17.6                                | 20.3                                   |
| 48wks.18       | 48                           | 15       | 30          | 26          | 4.9  | 6.2  | 9.5  | 14.4 | 7.0  | 42.0          | -23.1                               | 15.4                                   |
| 59wks.2a       | 59                           | 15       | 30          | 26          | 8.9  | 4.0  | 7.7  | 9.9  | 9.9  | 40.4          | 8.8                                 | 11.0                                   |
| 59wks.4a       | 59                           | 15       | 31          | 27          | 6.2  | 4.6  | 6.3  | 12.2 | 18.2 | 47.6          | 100.0                               | 30.7                                   |
| 59wks.10b      | 59                           | 15       | 30          | 26          | 5.8  | 3.9  | 6.0  | 12.0 | 16.4 | 44.0          | 79.9                                | 20.9                                   |
| 94wks.A3       | 94                           | 15       | 32          | 28          | 7.4  | 3.1  | 5.9  | 13.2 | 15.3 | 44.9          | 68.1                                | 23.4                                   |
| 94wks.F4       | 94                           | 15       | 30          | 26          | 5.3  | 4.2  | 6.0  | 13.4 | 15.7 | 44.7          | 73.0                                | 22.7                                   |
| 176wks.C2      | 176                          | 14       | 28          | 24          | 6.3  | 13.3 | 10.5 | 6.6  | 4.3  | 41.2          | -52.7                               | 13.2                                   |
| 176wks.H1      | 176                          | 13       | 30          | 26          | 4.6  | 2.6  | 6.7  | 14.1 | 7.3  | 35.1          | -19.8                               | -3.6                                   |
| 176wks.F1      | 176                          | 13       | 28          | 24          | 5.6  | 3.1  | 6.4  | 11.7 | 6.5  | 33.3          | -28.6                               | -8.5                                   |
| 176wks.4       | 176                          | 14       | 31          | 27          | 1.8  | 7.8  | 10.9 | 10.4 | 7.1  | 38.2          | -22.0                               | 4.9                                    |
| 176wks.10      | 176                          | 15       | 31          | 27          | 5.9  | 4.5  | 6.0  | 11.6 | 17.3 | 45.3          | 90.1                                | 24.4                                   |

**Table S2:** Abundance of oligomannose-type glycans for a cross-clade panel of gp120s. A breakdown of the distribution of structures within the oligomannose series (Man<sub>5-9</sub>GlcNAc<sub>2</sub>) are also reported in addition to the total PNGSs on gp120 and on the outer domain. Gp120s are grouped together according to their clade. Transmitter/founder viruses are labeled T/F.

|                                                                                                                                            | Clade     | M5        | M6        | M7        | M8        | M9        | Total        | Total PNGSs       | OD PNGSs        |
|--------------------------------------------------------------------------------------------------------------------------------------------|-----------|-----------|-----------|-----------|-----------|-----------|--------------|-------------------|-----------------|
| <b>0260.V5.C36</b><br><b>191084 B7.19</b><br><b>Q23-17</b><br><b>BG505</b><br><b>94UG103</b><br><b>92RW020</b><br><b>Q842</b>              | A         | 6.7       | 5.8       | 5.7       | 9.5       | 14.3      | 42.0         | 27                | 16              |
|                                                                                                                                            | A (T/F)   | 5.5       | 6.8       | 9.9       | 11.7      | 7.9       | 41.7         | 25                | 14              |
|                                                                                                                                            | A         | 9.1       | 7.2       | 7.1       | 9.4       | 5.4       | 38.3         | 23                | 15              |
|                                                                                                                                            | A         | 7.4       | 5.5       | 8.7       | 11.8      | 9.7       | 43.1         | 24                | 15              |
|                                                                                                                                            | A         | 8.0       | 7.4       | 8.2       | 8.9       | 14.2      | 46.7         | 27                | 16              |
|                                                                                                                                            | A         | 4.1       | 4.6       | 7.5       | 11.2      | 7.7       | 35.1         | 25                | 16              |
|                                                                                                                                            | A         | 5.6       | 5.7       | 6.7       | 6.2       | 2.3       | 26.6         | 23                | 15              |
| <b>BaL</b><br><b>JRCSF</b><br><b>HXB2</b><br><b>SF162</b><br><b>TRJO_A2</b><br><b>1056_TA11_1826</b><br><b>1012_11_TC21</b><br><b>JRFL</b> | B         | 2.5       | 3.1       | 6.2       | 10.7      | 11.6      | 34.1         | 23                | 14              |
|                                                                                                                                            | B         | 2.8       | 3.7       | 6.6       | 7.8       | 8.5       | 29.4         | 23                | 14              |
|                                                                                                                                            | B         | 5.5       | 4.7       | 8.2       | 12.0      | 10.3      | 40.7         | 24                | 14              |
|                                                                                                                                            | B         | 5.7       | 4.2       | 7.9       | 13.6      | 12.8      | 44.2         | 21                | 14              |
|                                                                                                                                            | B         | 8.2       | 6.2       | 7.9       | 11.9      | 6.6       | 40.8         | 27                | 15              |
|                                                                                                                                            | B (T/F)   | 5.4       | 5.7       | 7.4       | 9.1       | 8.0       | 35.4         | 25                | 15              |
|                                                                                                                                            | B (T/F)   | 5.5       | 5.5       | 8.5       | 11.8      | 9.9       | 41.2         | 28                | 15              |
| B                                                                                                                                          | 5.4       | 6.3       | 6.9       | 11.3      | 12.1      | 42.0      | 23           | 14                |                 |
| <b>96ZM651</b><br><b>Du156</b><br><b>ZM247v1(Rev-)</b><br><b>ZM214M_SGA_A3</b><br><b>IAVI C22</b><br><b>Ce7084</b>                         | C         | 4.8       | 5.5       | 7.6       | 6.6       | 4.5       | 29.0         | 27                | 12              |
|                                                                                                                                            | C         | 6.7       | 6.0       | 7.1       | 9.1       | 8.0       | 37.0         | 24                | 14              |
|                                                                                                                                            | C         | 9.2       | 6.9       | 6.7       | 11.7      | 14.9      | 49.3         | 27                | 16              |
|                                                                                                                                            | C         | 4.3       | 4.2       | 5.4       | 7.2       | 2.7       | 23.8         | 23                | 12              |
|                                                                                                                                            | C         | 5.8       | 5.7       | 10.3      | 11.4      | 5.9       | 39.2         | 24                | 15              |
|                                                                                                                                            | C (T/F)   | 9.4       | 7.9       | 7.7       | 6.8       | 2.9       | 34.7         | 27                | 14              |
| <b>C1080.B2</b><br><b>92TH021</b><br><b>BJOX015000.11.5</b><br><b>C3347</b>                                                                | AE        | 6.1       | 5.5       | 7.7       | 14.5      | 12.4      | 46.2         | 23                | 14              |
|                                                                                                                                            | AE        | 7.3       | 6.3       | 8.5       | 11.6      | 8.5       | 42.1         | 24                | 14              |
|                                                                                                                                            | AE (T/F)  | 7.8       | 6.2       | 7.3       | 10.3      | 5.8       | 37.3         | 25                | 14              |
|                                                                                                                                            | AE        | 5.4       | 4.8       | 6.6       | 10.0      | 6.1       | 32.8         | 24                | 13              |
| <b>P0402_c2_11</b><br><b>X1193_c1</b><br><b>X1254_3</b><br><b>X2088</b>                                                                    | G         | 10.6      | 8.8       | 9.3       | 11.6      | 6.0       | 46.3         | 27                | 16              |
|                                                                                                                                            | G         | 7.2       | 7.4       | 9.3       | 15.0      | 11.7      | 50.5         | 27                | 15              |
|                                                                                                                                            | G         | 5.3       | 5.1       | 6.9       | 10.1      | 5.7       | 33.0         | 25                | 14              |
|                                                                                                                                            | G         | 7.0       | 7.3       | 7.4       | 7.7       | 4.4       | 33.7         | 27                | 17              |
|                                                                                                                                            |           | <b>M5</b> | <b>M6</b> | <b>M7</b> | <b>M8</b> | <b>M9</b> | <b>TOTAL</b> | <b>Total PNGS</b> | <b>OD PNGSs</b> |
|                                                                                                                                            | <b>A</b>  | 6.6       | 6.1       | 7.7       | 9.8       | 8.8       | 39.1         | 24.9              | 15.3            |
|                                                                                                                                            | <b>B</b>  | 5.1       | 4.9       | 7.5       | 11.0      | 10.0      | 38.5         | 24.3              | 14.4            |
|                                                                                                                                            | <b>C</b>  | 6.7       | 6.0       | 7.5       | 8.8       | 6.5       | 35.5         | 25.3              | 13.8            |
|                                                                                                                                            | <b>AE</b> | 6.6       | 5.7       | 7.5       | 11.6      | 8.2       | 39.6         | 24.0              | 13.8            |
|                                                                                                                                            | <b>G</b>  | 7.5       | 7.2       | 8.2       | 11.1      | 7.0       | 40.9         | 26.5              | 15.5            |

**Table S3:** Potency of neutralization for a panel of HIV bnAb against the CAP256 pseudoviruses. Values are reported as IC<sub>50</sub> in µg/mL and colour coded according to the key.

| Virus sequence | Time after infection (Weeks) | VRC01 | PGV04 | J3    | PGT121 | PGT128 | PGT135 | PGT151 | PG9   | CAP256-VRC26.06 | CAP256-VRC26.27 | CAP256-VRC26.25 | CAP256-VRC26.11 |
|----------------|------------------------------|-------|-------|-------|--------|--------|--------|--------|-------|-----------------|-----------------|-----------------|-----------------|
| 6wks.PI        | 6                            | 0.050 | 0.056 | 0.307 | 0.047  | 0.028  | 0.202  | 0.004  | >10   | 0.03            | >50             | 1               | >50             |
| 15wks.SU       | 15                           | 0.338 | 0.529 | 0.082 | 0.010  | 0.009  | >20    | >5     | 0.012 | 0.063           | 0.001           | 0.001           | 0.014           |
| 23wks.14       | 23                           | 0.410 | 0.500 | 0.028 | 0.004  | 0.035  | >20    | >5     | >10   | 0.11            | >50             | >50             | >50             |
| 23wks.13       | 23                           | 0.246 | 1.671 | 0.037 | 0.019  | 0.066  | >20    | >5     | >10   | 0.086           | >50             | >50             | >50             |
| 30wks.2        | 30                           | 0.648 | 0.453 | 0.040 | 0.019  | 0.015  | >20    | >5     | >10   | 0.006           | >50             | >50             | 11.3            |
| 34wks.22       | 34                           | 0.600 | 0.790 | 0.027 | 0.005  | 0.021  | >20    | >5     | >10   | 0.02            | 1.58            | 10              | >50             |
| 34wks.31       | 34                           | 0.529 | 1.268 | 0.065 | 0.004  | 0.002  | >20    | >5     | 0.051 | 0.2             | 0.010           | 0.001           | 0.04            |
| 38wks.16       | 38                           | 0.815 | 0.770 | 0.046 | 0.017  | 0.052  | >20    | >5     | >10   | 0.6             | >50             | >50             | 24              |
| 38wks.19       | 38                           | 0.192 | 0.974 | 0.061 | 0.026  | 0.049  | >20    | 0.021  | >10   | 0.18            | >50             | >50             | >50             |
| 38wks.38       | 38                           | 0.265 | 0.945 | 0.080 | 0.045  | >1     | >20    | 0.009  | >10   | 0.19            | 20.9            | 5               | >50             |
| 48wks.8        | 48                           | 0.634 | 0.910 | 0.190 | 0.005  | 0.046  | >20    | 0.005  | 0.102 | 0.24            | 0.020           | 0.02            | 0.49            |
| 48wks.10       | 48                           | 0.420 | 0.320 | 0.100 | 0.003  | 0.006  | >20    | 0.005  | 0.378 | >50             | 0.020           | 0.02            | 0.27            |
| 48wks.17       | 48                           | 0.669 | 2.447 | 0.081 | 0.016  | 0.009  | >20    | >5     | >10   | >50             | >50             | >50             | >50             |
| 48wks.18       | 48                           | 4.483 | 1.711 | 0.242 | 0.015  | 0.005  | >20    | 0.015  | 0.184 | 1.1             | 3.98            | 0.02            | 0.24            |
| 59wks.2a       | 59                           | 0.549 | 0.468 | 0.079 | 0.044  | 0.011  | >20    | 0.015  | >10   | 8.9             | >50             | >50             | 1.7             |
| 59wks.4a       | 59                           | 0.332 | 0.684 | 0.089 | 0.027  | 0.029  | >20    | >5     | 0.660 | >50             | >50             | >50             | >50             |
| 59wks.10b      | 59                           | 0.764 | 0.501 | 0.033 | 0.009  | 0.011  | >20    | 0.020  | 0.169 | 0.2             | 0.020           | 0.02            | 0.54            |
| 94wks.A3       | 94                           | 0.311 | 0.519 | 0.041 | 0.033  | 0.016  | 0.029  | 0.005  | 1.49  | >50             | >50             | >50             | >50             |
| 94wks.F4       | 94                           | 0.521 | 0.688 | 0.044 | 0.026  | 0.047  | 0.009  | 0.008  | 2.16  | >50             | >50             | >50             | >50             |
| 176wks.C2      | 176                          | 0.106 | 0.088 | 0.061 | 0.055  | >1     | >20    | 0.002  | >10   | >50             | >50             | >50             | >50             |
| 176wks.H1      | 176                          | 0.161 | 0.255 | 0.105 | >5     | >1     | >20    | 0.004  | 1.45  | >50             | >50             | >50             | >50             |
| 176wks.F1      | 176                          | 0.065 | 0.170 | 0.024 | 0.217  | >1     | >20    | 0.002  | >10   | >50             | >50             | >50             | >50             |
| 176wks.4       | 176                          | 0.599 | 3.083 | 0.080 | >5     | >1     | >20    | 0.009  | >10   | >50             | >50             | >50             | >50             |
| 176wks.10      | 176                          | 0.546 | 0.425 | 0.061 | 0.204  | 0.010  | >20    | 0.008  | >10   | >50             | >50             | >50             | >50             |

| IC <sub>50</sub> (ug/mL) |
|--------------------------|
| <0.01                    |
| 0.01-0.1                 |
| >0.1-1                   |
| >1                       |
